# Supplementary material for: Profiling the inhibitory receptors LAG-3, TIM-3, and TIGIT in renal cell carcinoma reveals malignancy
Source: PubMed Central journal article supplement (PMC8452744; doi:10.1038/s41467-021-25865-0), 2021-09-20
Supplement: 41467_2021_25865_MOESM1_ESM.pdf [file 41467_2021_25865_MOESM1_ESM.pdf]

## Supplementary Information (on-line only)

### Table of contents

|                              |   |
|------------------------------|---|
| Supplementary Figure 1 ..... | 2 |
| Supplementary Figure 2 ..... | 3 |
| Supplementary Figure 3 ..... | 4 |
| Supplementary Figure 4 ..... | 5 |
| Supplementary Figure 5 ..... | 5 |
|                              |   |
| Supplementary Table 1 .....  | 6 |
| Supplementary Table 2 .....  | 6 |
| Supplementary Table 3 .....  | 7 |
| Supplementary Table 4 .....  | 7 |
| Supplementary Table 5 .....  | 8 |

Supplementary Fig 1

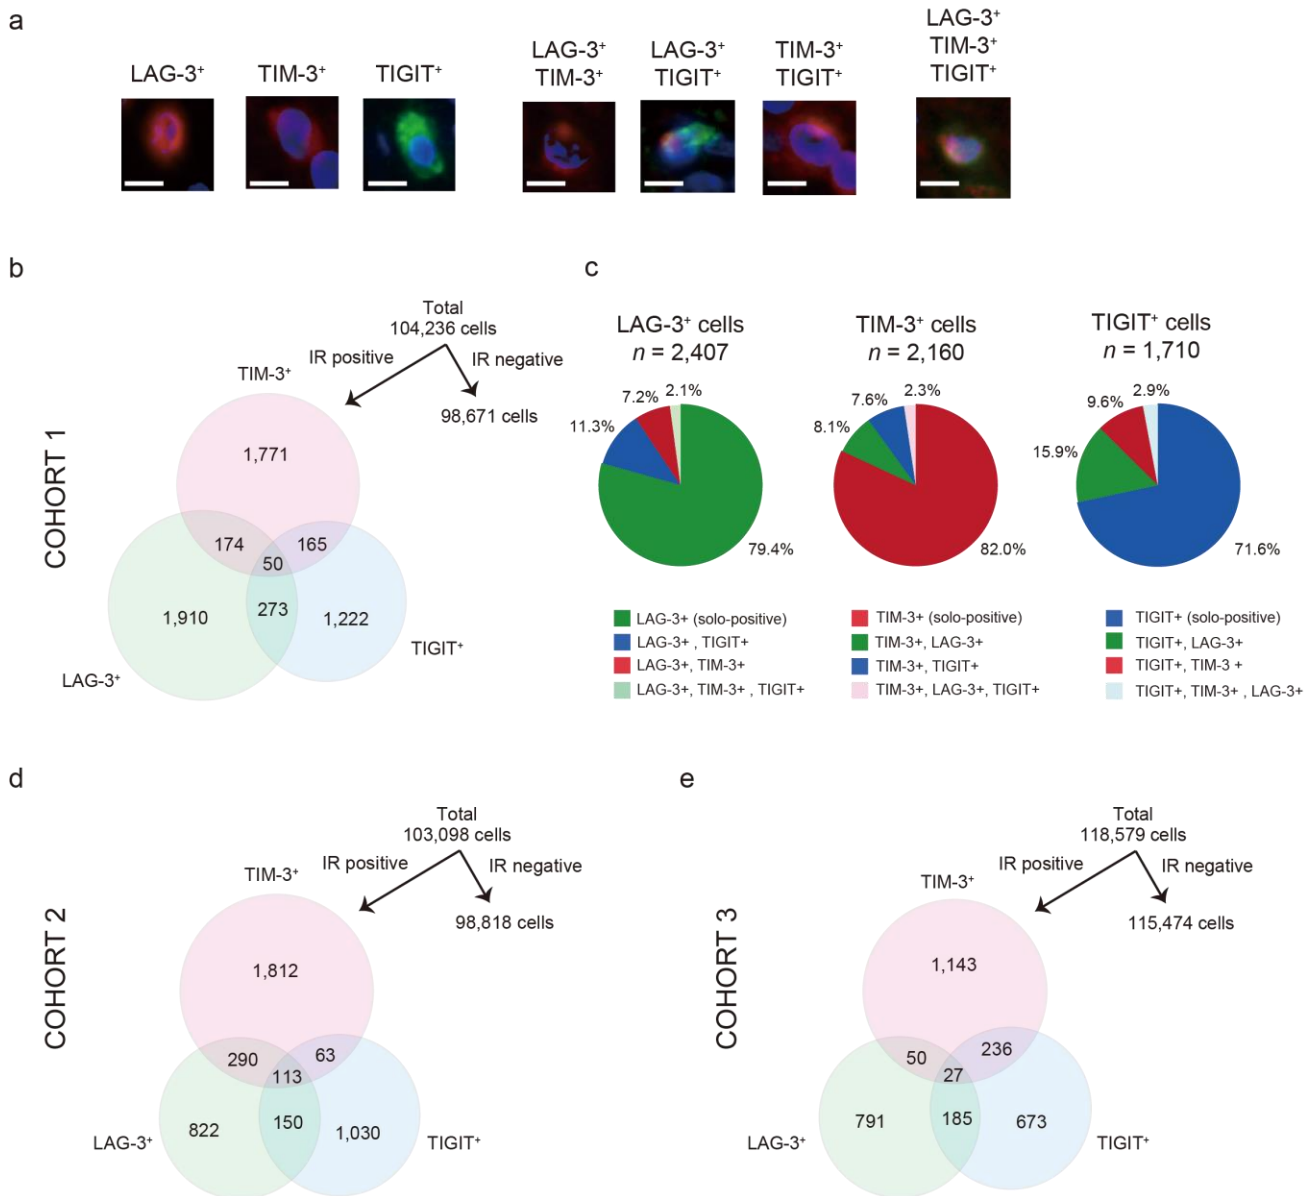

**Supplementary Fig 1. Cellular relationship of LAG-3, TIM-3, and TIGIT expression in human RCC tumours by multiplexed immunofluorescence staining.** **a** Cell-by-cell images of each defined cell phenotype displaying multi-colour immunolabelling for LAG-3, TIM-3, and TIGIT together with DAPI. Scale bars, 10  $\mu$ m (white) **b** Venn diagram depicting the cellular overlap of the three IR expressions with multi-colour staining for LAG-3, TIM-3, and TIGIT in COHORT 1 samples. **c** Percent distributions of different IR expressions in inferred IR-positive cells in **b**. **d-e** Venn diagram depicting the cellular overlap of the three IR expressions with multi-colour staining for LAG-3, TIM-3, and TIGIT in COHORT 2 (**d**) and COHORT 3 (**e**) samples.

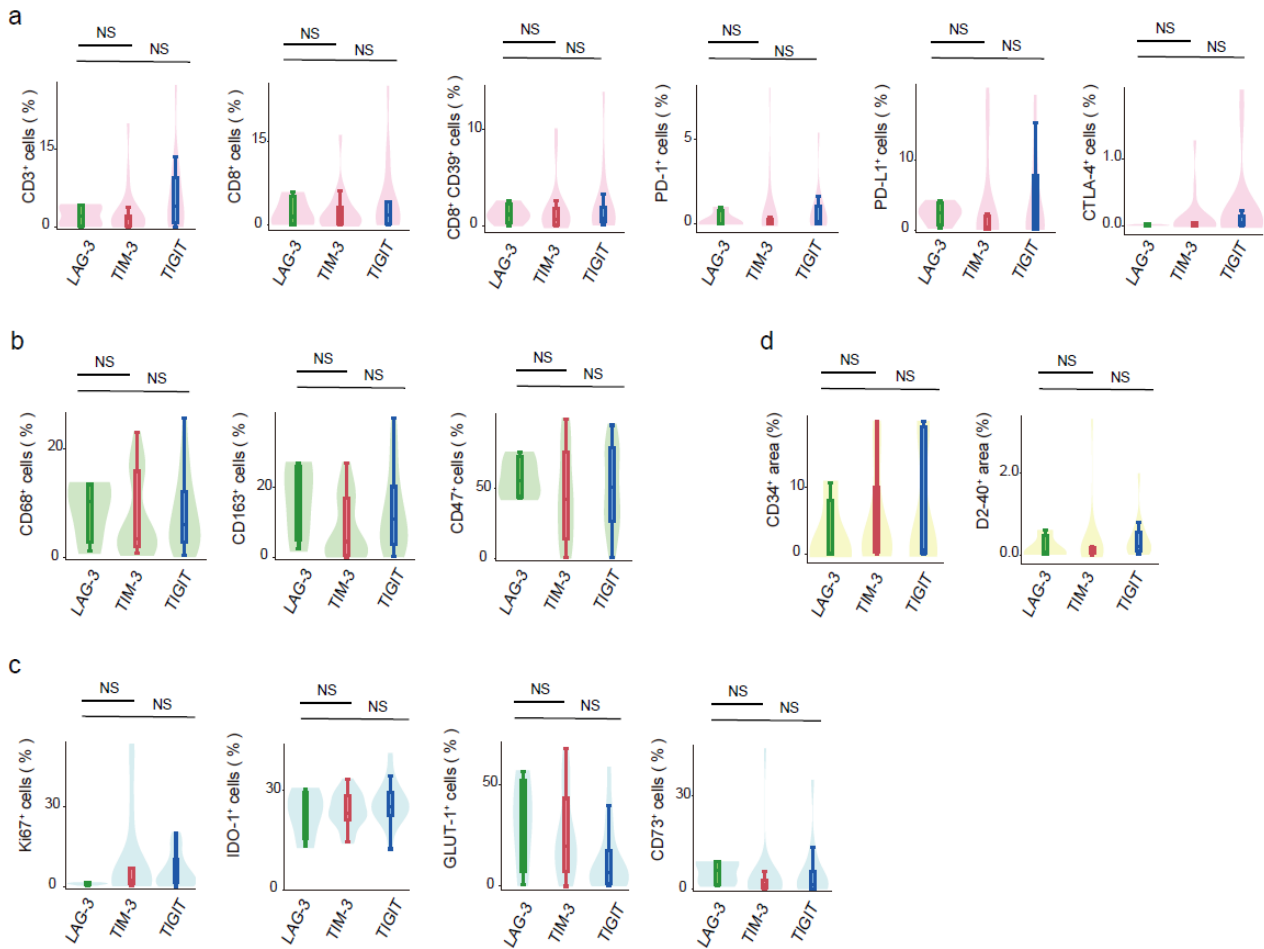

**Supplementary Fig 2. Phenotypic signatures of the new IRs (LAG-3, TIM-3, and TIGIT) and the tumour immune microenvironment in human non-ccRCC tumours.** a-d Violin and box plots of acquired immunity (a), innate immunity (b), inhibitory tumour metabolism (c), and vascular attribute (d) signatures from 41 human non-ccRCC samples. The lines within the boxes represent the medians, the upper and lower ends of the boxes represent the upper and lower quartiles, and the bars represent the minimum and maximum values in 1.5 times the IQR. *p* values were determined with a two-tailed Mann–Whitney U-test. Source data are provided as a Source data file.

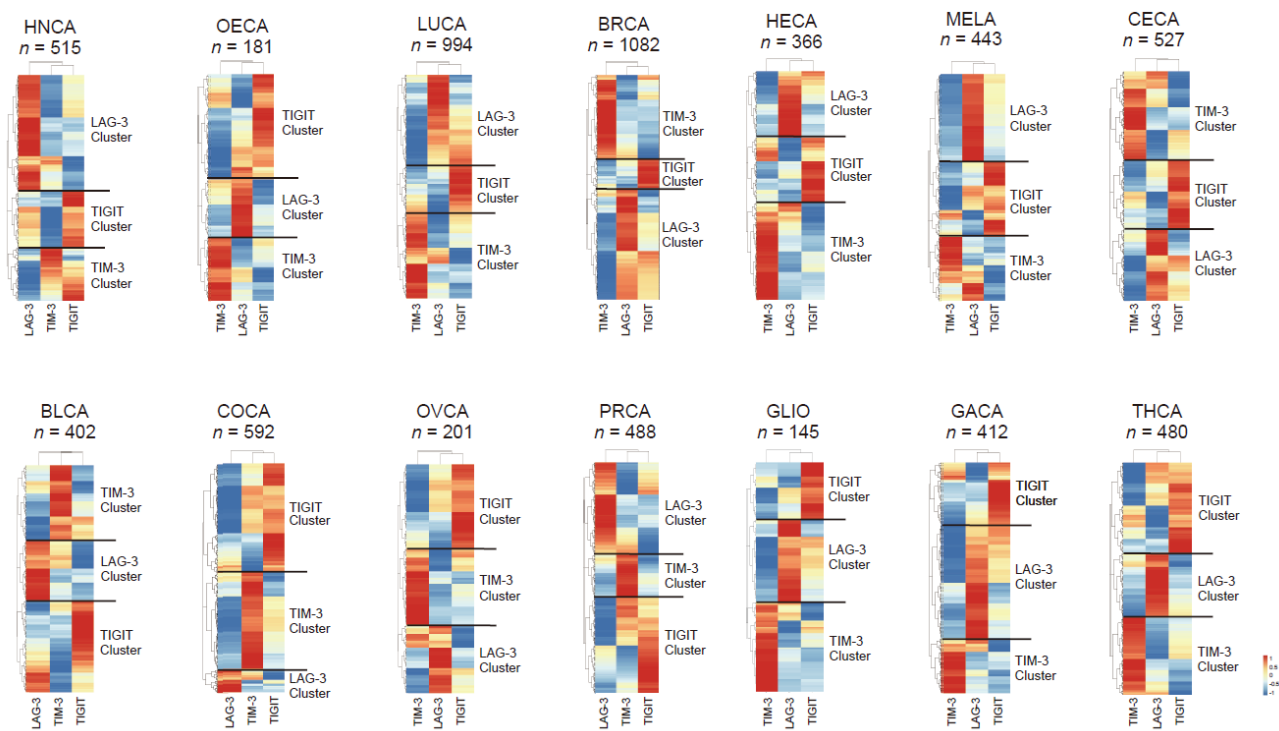

**Supplementary Fig 3. A pan-cancer analysis of LAG-3, TIM-3, and TIGIT gene expression levels.** Hierarchical clustering heatmap (low, blue; high, red) using inferred IR signatures from RNA-seq data analysis of 14 different cancer types in the TCGA dataset.<sup>41)</sup>

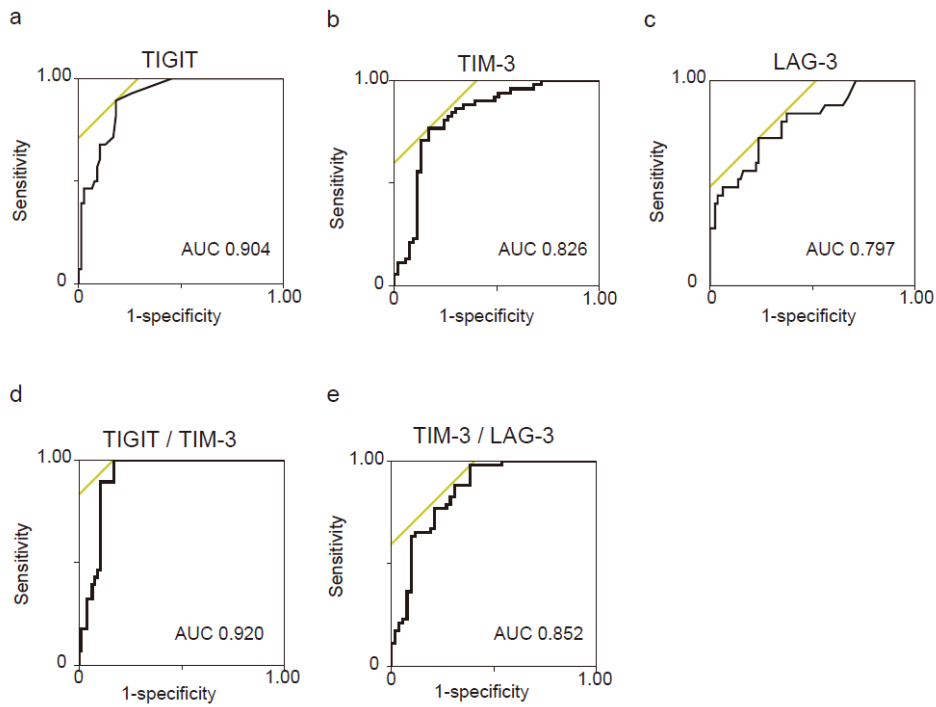

**Supplementary Fig 4. ROC-AUC analysis discriminating the phenotypic signatures of the new IRs (LAG-3, TIM-3, and TIGIT) by immunohistochemistry in COHORT 1.** a-e Receiver operating characteristic (ROC) curves for TIGIT (a), TIM-3 (b) and LAG-3 (c) expression, the ratio of TIGIT/TIM-3 (d) and TIM-3/LAG-3 (e) by immunohistochemistry for the new IRs clusters.

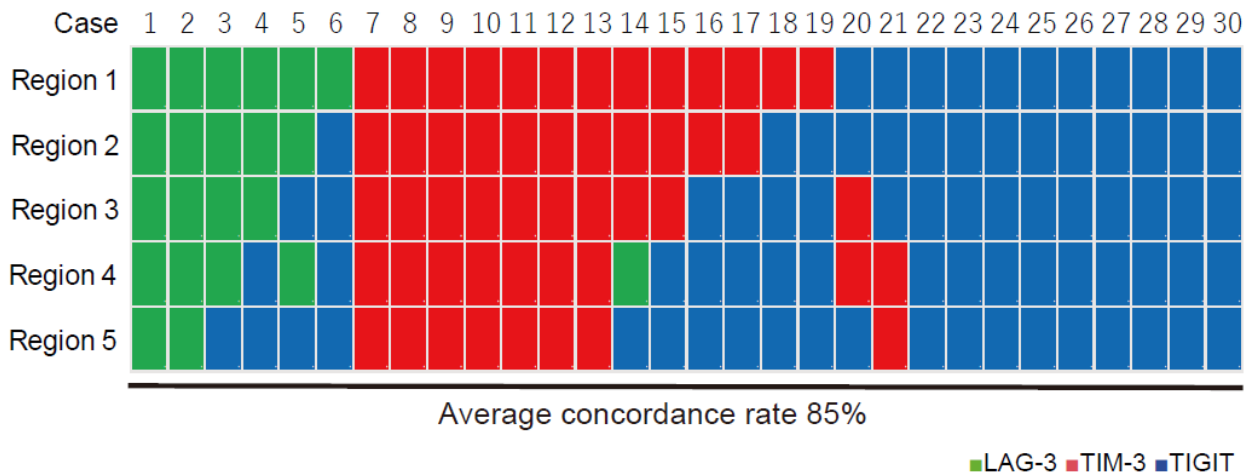

**Supplementary Fig 5. Consistency in IR profiles within the same tumour obtained by multi-region samplings from a single tumour in 30 primary ccRCC patients in COHORT 1.**

**Supplementary Table 1. Parameters associated with postoperative disease recurrence and overall mortality in primary ccRCC after adjusting for confounders with univariable and multivariable Cox regression analyses in COHORT 1.**

| Variable                                | Recurrence-free survival |              |        |   |                | Overall survival |              |        |      |                |       |       |
|-----------------------------------------|--------------------------|--------------|--------|---|----------------|------------------|--------------|--------|------|----------------|-------|-------|
|                                         | Univariate               | Multivariate |        |   |                | Univariate       | Multivariate |        |      |                |       |       |
|                                         | <i>p</i> value           | HR           | 95% CI |   | <i>p</i> value | <i>p</i> value   | HR           | 95% CI |      | <i>p</i> value |       |       |
| Age                                     | 0.015                    | 1.03         | 1.00   | - | 1.05           | 0.043            | 0.001        | 1.05   | 1.02 | -              | 1.09  | 0.005 |
| Gender (male vs. female)                | 0.615                    |              |        |   |                | 0.691            | 0.222        |        |      |                |       | 0.642 |
| Nuclear grade (G3/4 vs. G1/2)           | < 0.001                  | 2.32         | 1.26   | - | 4.30           | 0.007            | < 0.001      | 3.39   | 1.49 | -              | 7.72  | 0.004 |
| Pathological T stage ( pT3/4 vs. pT1/2) | < 0.001                  | 1.97         | 1.11   | - | 3.48           | 0.020            | < 0.001      |        |      |                |       | 0.341 |
| Venous invasion (yes vs. no)            | 0.087                    |              |        |   |                | 0.779            | < 0.001      |        |      |                |       | 0.200 |
| Tumour size                             | < 0.001                  | 1.01         | 1.00   | - | 1.02           | 0.022            | < 0.001      | 1.01   | 1.00 | -              | 1.02  | 0.047 |
| IR profile                              | 0.291                    |              |        |   |                | 0.656            | 0.028        |        |      |                |       | 0.037 |
| LAG-3 vs. TIM-3                         | 0.930                    |              |        |   |                | 0.543            | 0.047        | 2.15   | 1.03 | -              | 4.46  | 0.041 |
| LAG-3 vs. TIGIT                         | 0.146                    |              |        |   |                | 0.391            | 0.040        | 4.74   | 0.63 | -              | 35.71 | 0.131 |

**Supplementary Table 2. Clinicopathological characteristics associated with the phenotypic signatures of the new IRs (LAG-3, TIM-3, and TIGIT) in 47 metastatic ccRCC tumour samples (COHORT 2). *p* value was determined with a two-tailed Fisher's exact test.**

| Characteristic                               | All patients<br>( <i>n</i> = 47) | IR profile                   |                              |                              | <i>p</i> value |
|----------------------------------------------|----------------------------------|------------------------------|------------------------------|------------------------------|----------------|
|                                              |                                  | LAG-3<br><i>n</i> = 14 (30%) | TIM-3<br><i>n</i> = 22 (47%) | TIGIT<br><i>n</i> = 11 (23%) |                |
| Localisation of distant metastasis, no. (%): |                                  |                              |                              |                              | 0.071          |
| Bone                                         | 18 ( 38% )                       | 9 ( 64% )                    | 5 ( 23% )                    | 4 ( 36% )                    |                |
| Viscera                                      | 11 ( 23% )                       | 1 ( 7% )                     | 8 ( 36% )                    | 2 ( 18% )                    |                |
| Lung                                         | 8 ( 17% )                        | 2 ( 14% )                    | 2 ( 9% )                     | 4 ( 36% )                    |                |
| Brain                                        | 4 ( 9% )                         | 0 ( 0% )                     | 4 ( 18% )                    | 0 ( 0% )                     |                |
| Others                                       | 6 ( 13% )                        | 2 ( 14% )                    | 3 ( 14% )                    | 1 ( 9% )                     |                |

**Supplementary Table 3. Clinicopathological characteristics associated with the phenotypic signatures of the new IRs (LAG-3, TIM-3, and TIGIT) in 41 primary non-ccRCC tumour samples (COHORT 3). *p* value was determined with a two-tailed Fisher's exact test.**

| Characteristic             | All patients<br>( <i>n</i> = 41) | IR profile                  |                              |                              | <i>p</i> value |
|----------------------------|----------------------------------|-----------------------------|------------------------------|------------------------------|----------------|
|                            |                                  | LAG-3<br><i>n</i> = 4 (10%) | TIM-3<br><i>n</i> = 20 (49%) | TIGIT<br><i>n</i> = 17 (41%) |                |
| Histological type, no (%): |                                  |                             |                              |                              | 0.213          |
| Papillary                  | 12 ( 29% )                       | 2 ( 50% )                   | 4 ( 20% )                    | 6 ( 35% )                    |                |
| Chromophobe                | 12 ( 29% )                       | 0 ( 0% )                    | 10 ( 50% )                   | 2 ( 12% )                    |                |
| Sarcomatoid                | 8 ( 20% )                        | 1 ( 25% )                   | 3 ( 15% )                    | 4 ( 24% )                    |                |
| Xp11 translocation         | 7 ( 17% )                        | 1 ( 25% )                   | 2 ( 10% )                    | 4 ( 24% )                    |                |
| Collecting duct            | 2 ( 5% )                         | 0 ( 0% )                    | 1 ( 5% )                     | 1 ( 6% )                     |                |

**Supplementary Table 4. Parameters associated with postoperative disease recurrence and overall mortality in primary ccRCC after adjusting for confounders with univariable and multivariable Cox regression analyses in COHORT 4.**

| Variable                               | Recurrence-free survival |              |        |         |                | Overall survival |      |        |         |                |
|----------------------------------------|--------------------------|--------------|--------|---------|----------------|------------------|------|--------|---------|----------------|
|                                        | Univariate               | Multivariate |        |         | Univariate     | Multivariate     |      |        |         |                |
|                                        | <i>p</i> value           | HR           | 95% CI |         | <i>p</i> value | <i>p</i> value   | HR   | 95% CI |         | <i>p</i> value |
| Age                                    | 0.862                    |              |        |         | 0.690          | 0.132            |      |        |         | 0.508          |
| Gender (male vs. female)               | 0.960                    |              |        |         | 0.852          | 0.518            |      |        |         | 0.671          |
| Nuclear grade (G3/4 vs. G1/2)          | < 0.001                  |              |        |         | 0.072          | <0.001           |      |        |         | 0.688          |
| Pathological T stage (pT3/4 vs. pT1/2) | < 0.001                  | 5.13         | 2.23   | - 11.76 | <0.001         | 0.001            | 2.61 | 0.87   | - 7.81  | 0.086          |
| Venous invasion (yes vs. no)           | < 0.001                  |              |        |         | 0.243          | <0.001           | 4.90 | 1.60   | - 14.93 | 0.005          |
| Tumour size                            | < 0.001                  | 1.03         | 1.01   | - 1.05  | 0.002          | 0.001            |      |        |         | 0.109          |
| IR profile                             | 0.052                    |              |        |         | 0.167          | 0.003            |      |        |         | 0.009          |
| LAG-3 vs. TIM-3                        | 0.021                    |              |        |         | 0.086          | 0.004            | 4.81 | 1.60   | - 15.87 | 0.010          |
| LAG-3 vs. TIGIT                        | 0.097                    |              |        |         | 0.747          | 0.013            | 4.69 | 1.28   | - 17.24 | 0.020          |

**Supplementary Table 5. List of antibodies used for immunohistochemical studies.**

| Antibodies                    | Source                    | Cat #      | Dilution   |
|-------------------------------|---------------------------|------------|------------|
| Rabbit monoclonal anti-LAG-3  | Abcam                     | ab209236   | 1/50-1/500 |
| Rabbit polyclonal anti-TIM-3  | Abcam                     | ab185703   | 1/100      |
| Mouse monoclonal anti-TIGIT   | DIANOVA                   | #DIA-TG1-M | 1/100      |
| Rabbit monoclonal anti-CD3    | NICHIREI                  | #413591    | Diluted    |
| Mouse monoclonal anti-CD8     | NICHIREI                  | #413211    | 1/50       |
| Rabbit monoclonal anti-CD39   | Abcam                     | ab223842   | 1/1000     |
| Mouse monoclonal anti-PD-1    | Cell Signaling Technology | #43248     | 1/200      |
| Rabbit monoclonal anti-PD-L1  | Cell Signaling Technology | #13684     | 1/200      |
| Mouse monoclonal anti-CTLA-4  | Abcam                     | ab227709   | 1/100      |
| Mouse monoclonal anti-CD68    | NICHIREI                  | 413791     | Diluted    |
| Rabbit monoclonal anti-CD163  | Abcam                     | ab182422   | 1/500      |
| Rabbit polyclonal anti-CD47   | Abcam                     | ab175388   | 1/500      |
| Ki67                          | DAKO                      | M7240      | 1/50       |
| IDO-1                         | Origene                   | UM 570091  | 1/100      |
| Rabbit monoclonal anti-GLUT-1 | Abcam                     | ab115730   | 1/500      |
| Rabbit monoclonal anti-CD73   | Abcam                     | ab133582   | 1/100      |
| Mouse monoclonal anti-CD34    | NICHIREI                  | #413361    | 1/100      |
| Mouse monoclonal anti-D2-40   | NICHIREI                  | #413451    | Diluted    |
