# Supplementary material for: Profiling the inhibitory receptors LAG-3, TIM-3, and TIGIT in renal cell carcinoma reveals malignancy
Source: PubMed Central journal article supplement (PMC8452744; doi:10.1038/s41467-021-25865-0), 2021-09-20
Supplement: 41467_2021_25865_MOESM3_ESM.pdf [file 41467_2021_25865_MOESM3_ESM.pdf]

### **Description of Additional Supplementary Files**

File Name: Supplementary Data 1

Description: Clinical and pathological data of COHORT1

File Name: Supplementary Data 2

Description: Clinical and pathological data of COHORT4
